# Supplementary material for: Synergistic lubrication of a porous MoS2-POSS nanohybrid
Source: Royal Society of Chemistry journal article supplement (doi:10.1039/d0ra02014a), 2020-01-01
Supplement: d0ra02014a1.pdf [file d0ra02014a1.pdf]

## **Supplementary Information**

### **Synergistic lubrication of Porous MoS<sub>2</sub>-POSS nanohybrid**

Xiaoxuan Xu<sup>1</sup>, Songlong Jiao<sup>2</sup>, Zhengquan Liu<sup>2</sup>, Lei Liu<sup>2,\*</sup>

1. Nanjing Institute of Industry Technology, Nanjing 210023, People's Republic of China
2. School of Mechanical Engineering, Southeast University, Nanjing 211189, People's Republic of China

\*Corresponding author, email: liulei@seu.edu.cn



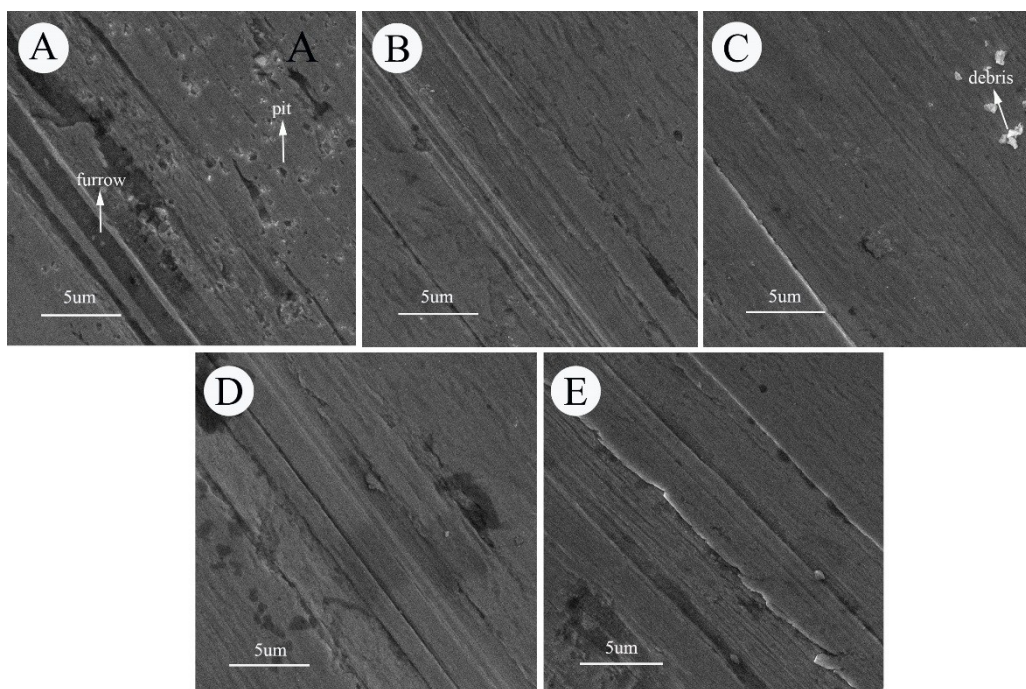

**Fig. S4.** SEM images of the worn surface on the pin lubricated with LP containing: (a) 0.20wt%, (b) 0.40wt%, (c) 0.60wt%, (d) 0.80wt%, and (e) 1.00wt% POSS.

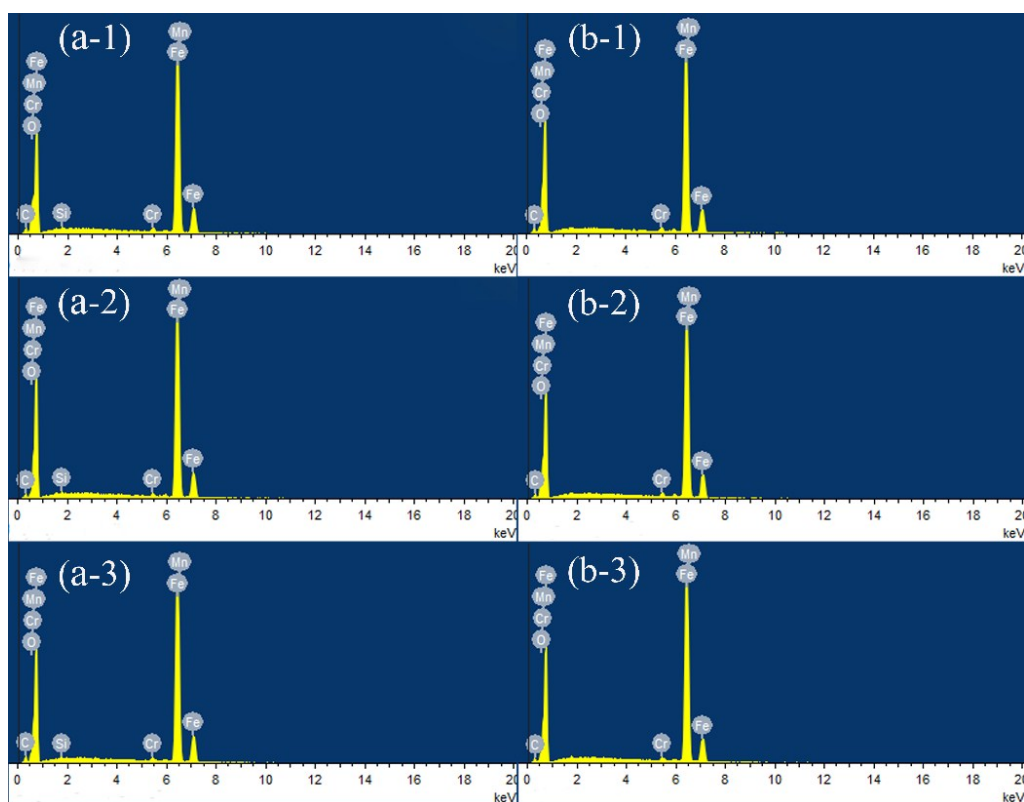

**Fig. S5.** EDS spectra of wear scars for the steel pin lubricated by LP containing (a-1) 0.20wt% POSS, (a-2) 0.60wt% POSS, (a-3) 1.00wt% POSS, (b-1) 0.20wt% MoS<sub>2</sub>, (b-2) 0.60wt% MoS<sub>2</sub>, (b-3) 1.00wt% MoS<sub>2</sub>, respectively.
